# Supplementary material for: Genetic Diversity and Relatedness among Captive African Painted Dogs in North America
Source: MDPI journal article supplement (doi:10.3390/genes12101463), 2021-09-22
Supplement: s1 [file s1]

MILLER-BUTTERWORTH ET AL.  
SUPPLEMENTARY INFORMATION

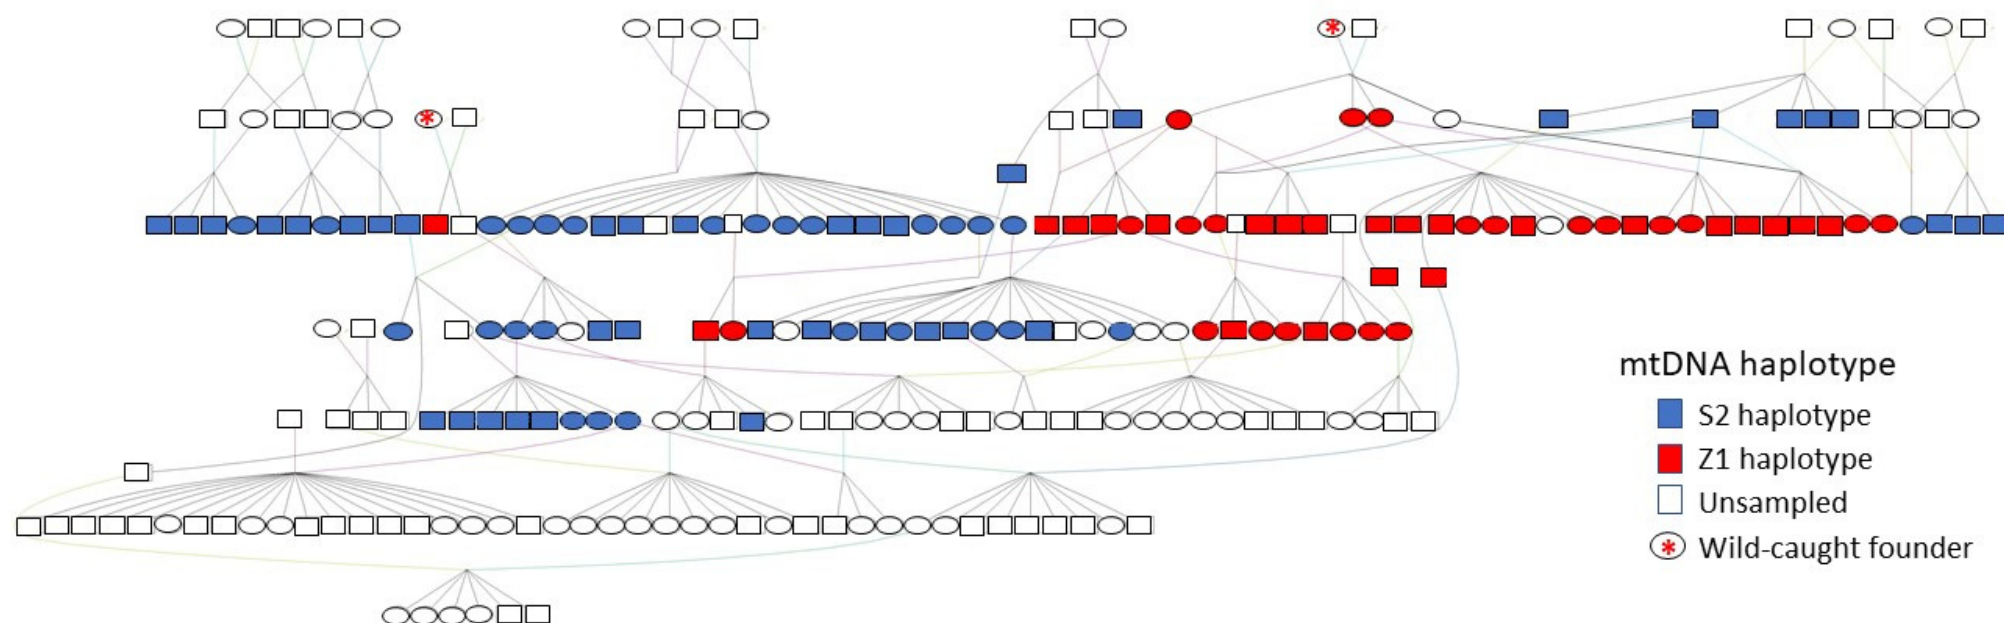

**Figure S1.** Pedigree of a subset of the North American African painted dog population, including sampled individuals ( $n = 109$ ), their parents, grandparents and offspring. Squares represent males, ovals represent females. Colors indicate mitochondrial DNA haplotypes of sampled individuals (blue = S2, red = Z1) and illustrate that all but one individual with the Z1 haplotype are descended from a single wild-caught female.
